# Supplementary material
Source: Springer Nature journal article supplement (https://www.springermedizin.de/resource/supplementary/40001_2013_103_MOESM2_ESM.pdf/9685268)

95% charlson Index

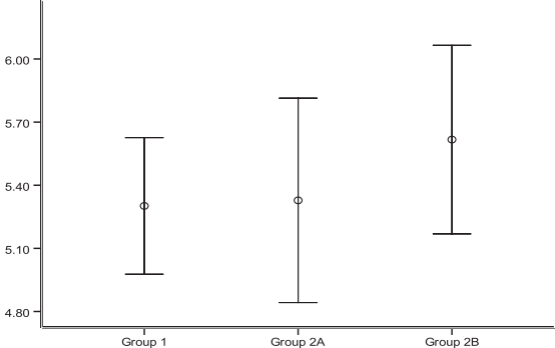

Supplement: MOESM2 [file 9685268]
